# Supplementary material for: The Pseudotargeted Metabolomics Study on the Toxicity of Fuzi Using Ultraperformance Liquid Chromatography Tandem Mass Spectrometry
Source: Hindawi journal article supplement (doi:10.1155/2022/6539675), 2022-09-13
Supplement: f1 [file 6539675.f1.zip]

| compound.name                   | Q1    | Q3_1 | Q3_2  |
|---------------------------------|-------|------|-------|
| Phenol                          | 93.0  | 65   | 75    |
| Pidolic acid                    | 128.0 | 82   | 52    |
| 2-Oxohexanoic acid              | 129.1 | 69   | 83    |
| 3-Methyl-2-oxopentanoate        | 129.1 | 69   | 83    |
| 4-Methyl-2-oxopentanoate        | 129.1 | 69   | 83    |
| L-Isoleucine                    | 130.1 | 130  | 58    |
| L-leucine                       | 130.1 | 130  | 88    |
| Threonate                       | 135.0 | 75   | 59    |
| 4-Hydroxybenzoate               | 137.0 | 93   | 65    |
| Salicylate                      | 137.0 | 93   | 65    |
| L-Glutamine                     | 145.1 | 127  | 109   |
| L-Glutamate                     | 146.0 | 102  | 128   |
| 3,4-Dihydroxybenzoate           | 153.0 | 109  | 65    |
| L-Phenylalanine                 | 164.1 | 103  | 147   |
| Vanillate                       | 167.0 | 108  | 69    |
| N-Acetyl-L-leucine              | 172.1 | 130  | 111   |
| Suberic acid                    | 173.1 | 111  | 109   |
| L-Citrulline                    | 174.1 | 131  |       |
| Hippurate                       | 178.1 | 77   | 134   |
| L-Tyrosine                      | 180.1 | 119  | 163   |
| Azelaic acid                    | 187.1 | 125  | 97    |
| Citrate                         | 191.0 | 111  | 87    |
| Isocitrate                      | 191.0 | 111  | 87    |
| Salicyluric acid                | 194.0 | 150  | 93    |
| Sebacic acid                    | 201.1 | 139  | 183   |
| L-Tryptophan                    | 203.1 | 116  | 142   |
| Indolelactate                   | 204.1 | 158  | 130   |
| N-Acetyl-L-phenylalanine        | 206.1 | 164  | 147   |
| Tetradecanoic acid              | 227.2 | 227  |       |
| (9Z)-Hexadecenoic acid          | 253.2 | 253  |       |
| Hexadecanoic acid               | 255.2 | 255  |       |
| Phenylacetylglutamine           | 263.1 | 145  | 127   |
| 16-Hydroxypalmitate             | 271.2 | 225  | 271   |
| (6Z,9Z,12Z)-Octadecatrienoic ac | 277.2 | 277  |       |
| (9Z,12Z,15Z)-Octadecatrienoic a | 277.2 | 277  |       |
| Linoleate                       | 279.2 | 279  |       |
| (11E)-Octadecenoic acid         | 281.2 | 281  |       |
| (9Z)-Octadecenoic acid          | 281.2 | 281  |       |
| Octadecanoic acid               | 283.3 | 283  |       |
| (5Z,8Z,11Z,14Z,17Z)-Icosapenta  | 301.2 | 301  | 257.2 |
| Arachidonate                    | 303.2 | 303  | 259.2 |
| Phytanate                       | 311.3 | 311  | 134   |
| Icosanoic acid                  | 311.3 | 311  | 134   |
| Erucic acid                     | 337.3 | 337  |       |
| Docosanoic acid                 | 339.3 | 339  |       |
| Estrone 3-sulfate               | 349.1 | 269  |       |
| Tetrahydrocorticosterone        | 349.2 | 305  | 331   |
| (15Z)-Tetracosenoic acid        | 365.3 | 265  |       |
| Chenodeoxycholate               | 391.3 | 247  | 391   |
| Deoxycholic acid                | 391.3 | 391  |       |
| 3beta-Hydroxypregn-5-en-20-     | 395.2 | 97   | 395   |
| Cholic acid                     | 407.3 | 407  |       |
| alpha-Tocopherol                | 429.4 | 163  | 429   |

|                                                                                 |       |       |       |
|---------------------------------------------------------------------------------|-------|-------|-------|
| Glycochenodeoxycholate                                                          | 448.3 | 74    | 448   |
| Glycodeoxycholate                                                               | 448.3 | 74    | 386   |
| Glycocholate                                                                    | 464.3 | 74    | 402   |
| Taurolithocholate                                                               | 482.3 | 482.3 |       |
| Taurochenodeoxycholate                                                          | 498.3 | 498.3 |       |
| Taurodeoxycholate                                                               | 498.3 | 498.3 |       |
| Taurocholate                                                                    | 514.3 | 514.3 |       |
| Naringin                                                                        | 579.2 | 427   | 339.2 |
| Bilirubin                                                                       | 583.3 | 285.1 | 213.1 |
| Thyroxine                                                                       | 775.7 | 126.9 | 604.8 |
| Phenyllactate                                                                   | 165.1 | 119   | 147   |
| N-Hydroxy-L-tryptophan                                                          | 219.1 | 144   | 132   |
| Chorismate                                                                      | 245.0 | 165   | 108   |
| Isochorismate                                                                   | 245.0 | 165   | 108   |
| 12(13)-EpOME                                                                    | 295.2 | 277   | 195   |
| 9(10)-EpOME                                                                     | 295.2 | 277   | 195   |
| 5-(3,4-Diacetoxybut-1-ynyl)-2,2-dimethyl-3H-furan-3-one                         | 353.0 | 273   | 152   |
| Dehydroepiandrosterone sulfate                                                  | 367.2 | 97    | 367   |
| Hyodeoxycholate                                                                 | 391.3 | 347.3 | 329.3 |
| Murideoxycholic acid                                                            | 391.3 | 347.3 | 329.3 |
| 3alpha,7alpha-Dihydroxy-12-oxo-10-phenyl-10H-benzo[5,6-b]furan-9-one            | 405.3 | 325.3 | 387.3 |
| 1-O-[2-(Acetylamino)-2-deoxy-2-phenylethyl]-beta-D-glucopyranoside              | 418.1 | 222   | 266   |
| Estrone glucuronide                                                             | 465.2 | 397   | 97    |
| S-(Hydroxymethyl)mycothiol                                                      | 497.1 | 203   | 225   |
| Glycochenodeoxycholate 7-sulfate                                                | 528.3 | 528   | 448   |
| (3Z)-Phytochromobilin                                                           | 583.3 | 299   | 227   |
| 15,16-Dihydrobiliverdin                                                         | 583.3 | 299   | 227   |
| 2'''-N-Acetyl-6'''-deamino-6'''-methyl-2,3,4-trihydroxy-5-methyl-2H-pyran-2-one | 657.3 | 367.2 | 657.3 |
| 4-Cresol                                                                        | 107.1 | 77    |       |
| Indole                                                                          | 116.1 | 100   |       |
| 4-Hydroxystyrene                                                                | 119.1 | 93    | 117   |
| Phenylacetaldehyde                                                              | 119.1 | 93    | 117   |
| 4-Hydroxyaniline                                                                | 144.0 | 58    |       |
| 2-Hydroxyphenylacetate                                                          | 151.0 | 93    |       |
| Methyl salicylate                                                               | 151.0 | 93    |       |
| 1-Fluorocyclohexadiene-cis,cis-3,6-dimethyl-4-nitro-                            | 165.0 | 121   |       |
| 2-Hydroxy-6-oxoocta-2,4,7-triene                                                | 167.0 | 83    | 69    |
| 3-(2,3-Dihydroxyphenyl)propan-1-ol                                              | 181.1 | 135   | 163   |
| Homovanillate                                                                   | 181.1 | 135   | 163   |
| 2-Hydroxy-6-oxo-7-methylocta-2,4,6-triene                                       | 183.1 | 139   |       |
| 3-Indoleacrylate                                                                | 186.1 | 142   | 116   |
| 4-Hydroxyphenyl acetate                                                         | 187.0 | 129   |       |
| 4-Hydroxyphenyl-4-hydroxybenzoate                                               | 229.0 | 116   | 57    |
| Stearidonic acid                                                                | 275.2 | 139   | 117   |
| (R)-10-Hydroxystearate                                                          | 299.3 | 299   |       |
| N-Acetyl-L-citrulline                                                           | 198.1 | 130   |       |
| Cystathionine                                                                   | 241.1 | 151   | 115   |
| Indolepyruvate                                                                  | 243.1 | 131   | 142   |
| N(alpha)-gamma-L-Glutamylhistidine                                              | 259.1 | 131   | 87    |
| L-Isoleucine                                                                    | 132.1 | 86    | 69    |
| L-leucine                                                                       | 132.1 | 86    | 91    |
| L-Glutamine                                                                     | 147.1 | 84    | 130   |
| L-Histidine                                                                     | 156.1 | 110   | 83    |
| L-Valine                                                                        | 159.1 | 113   | 72    |

|                                 |       |     |       |
|---------------------------------|-------|-----|-------|
| L-Phenylalanine                 | 166.1 | 120 | 103   |
| N6-Acetyl-L-lysine              | 171.1 | 84  |       |
| L-Arginine                      | 175.1 | 70  | 60    |
| Indole-3-acetate                | 176.1 | 130 | 103   |
| Hippurate                       | 180.1 | 105 | 77    |
| 1,7-Dimethylxanthine            | 181.1 | 124 | 96    |
| Theophylline                    | 181.1 | 124 | 96    |
| L-Tyrosine                      | 182.1 | 91  | 136   |
| L-Lysine                        | 188.1 | 84  | 143   |
| Caffeine                        | 195.1 | 138 | 110   |
| Indolelactate                   | 206.1 | 130 | 118   |
| Indolepyruvate                  | 221.1 | 130 | 91    |
| Phenylacetylglutamine           | 265.1 | 130 | 91    |
| Arachidonate                    | 269.2 | 93  | 119   |
| (6Z,9Z,12Z)-Octadecatrienoic ac | 279.2 | 95  | 67    |
| (9Z,12Z,15Z)-Octadecatrienoic a | 279.2 | 95  | 67    |
| Linoleate                       | 281.2 | 81  | 95    |
| (11E)-Octadecenoic acid         | 283.3 | 69  | 121   |
| (9Z)-Octadecenoic acid          | 283.3 | 69  | 121   |
| (4Z,7Z,10Z,13Z,16Z,19Z)-Docosa  | 329.2 | 91  | 131   |
| Chenodeoxycholate               | 357.3 | 105 | 133   |
| Cholic acid                     | 373.3 | 269 | 73    |
| Riboflavin                      | 377.1 | 243 | 72    |
| L-Palmitoylcarnitine            | 400.3 | 85  | 341.3 |
| alpha-Tocopherol                | 431.4 | 165 |       |
| Guanidinoacetate                | 118.1 | 58  | 91    |
| N-Methylaniline                 | 130.1 | 77  | 103   |
| 3-Oxo-3-ureidopropanoate        | 188.1 | 118 | 115   |
| Coniferyl acetate               | 223.1 | 181 | 139   |
| N8-Acetylspermidine             | 229.2 | 95  |       |
| Hexadecanoic acid               | 257.2 | 57  | 257   |
| Hexadecanal                     | 282.3 | 83  | 69    |
| Oleamide                        | 282.3 | 83  | 69    |
| (8E,10S)-10-Hydroperoxyoctade   | 337.2 | 225 |       |
| 9,10-Epoxy-18-hydroxystearate   | 337.2 | 225 |       |
| 3alpha,12alpha-Dihydroxy-5bet   | 355.3 | 267 | 73    |
| Deoxycholic acid                | 357.3 | 247 |       |
| Hyodeoxycholate                 | 357.3 | 247 |       |
| Murideoxycholic acid            | 357.3 | 247 |       |
| 3-Oxo-5beta-cholanate           | 375.3 | 271 |       |
| 3alpha,7alpha-Dihydroxy-12-ox   | 389.3 | 356 |       |
| 3alpha,12alpha-Dihydroxy-7-ox   | 407.3 | 335 | 389   |
| Urea-1-carboxylate              | 105.0 | 77  | 51    |
| 3-Guanidinopropanoate           | 132.1 | 117 |       |
| 4-Hydroxyphenylacetonitrile     | 134.1 | 77  |       |
| Mandelonitrile                  | 134.1 | 77  |       |
| Dihydrocoumarin                 | 149.1 | 77  | 103   |
| Pyruvophenone                   | 149.1 | 77  | 103   |
| Phenylpropanoate                | 151.1 | 105 | 79    |
| Methyleugenol                   | 179.1 | 105 | 79    |
| Methylisoeugenol                | 179.1 | 105 | 79    |
| 9-Oxononanoic acid              | 195.1 | 95  | 77    |
| (1E,3E)-4-Hydroxybuta-1,3-dier  | 203.0 | 85  | 57    |
| Didemethylcitalopram            | 319.1 | 241 | 283   |

|                               |       |     |     |
|-------------------------------|-------|-----|-----|
| S-Adenosyl-4-methylthio-2-oxi | 421.1 | 109 | 313 |
| Deisopropyldeethylatrazine    | 184.0 | 166 | 108 |
| 1-Hexadecanol                 | 284.3 | 57  | 135 |
| 9,10-EOT                      | 334.2 | 219 | 203 |
| Colnelenic acid               | 334.2 | 219 | 203 |
